# Supplementary material for: Therapeutic Evaluation of Synthetic Peucedanocoumarin III in an Animal Model of Parkinson’s Disease
Source: PubMed Central journal article supplement (PMC6862101; doi:10.3390/ijms20215481), 2019-11-04
Supplement: ijms-20-05481-s001.pdf [file ijms-20-05481-s001.pdf]

**SUPPLEMENTAL INFORMATION**

**Therapeutic evaluation of synthetic  
peucedanocoumarin III in an animal model of  
Parkinson's disease**

**Sangwoo Ham, Heejeong Kim, Jin-Ha Yoon, Hyojung Kim, Bo Reum Song, Jeong-Yun Choi, Yun-  
Song Lee, Seung-Mann Paek, Han-Joo Maeng, and Yunjong Lee**

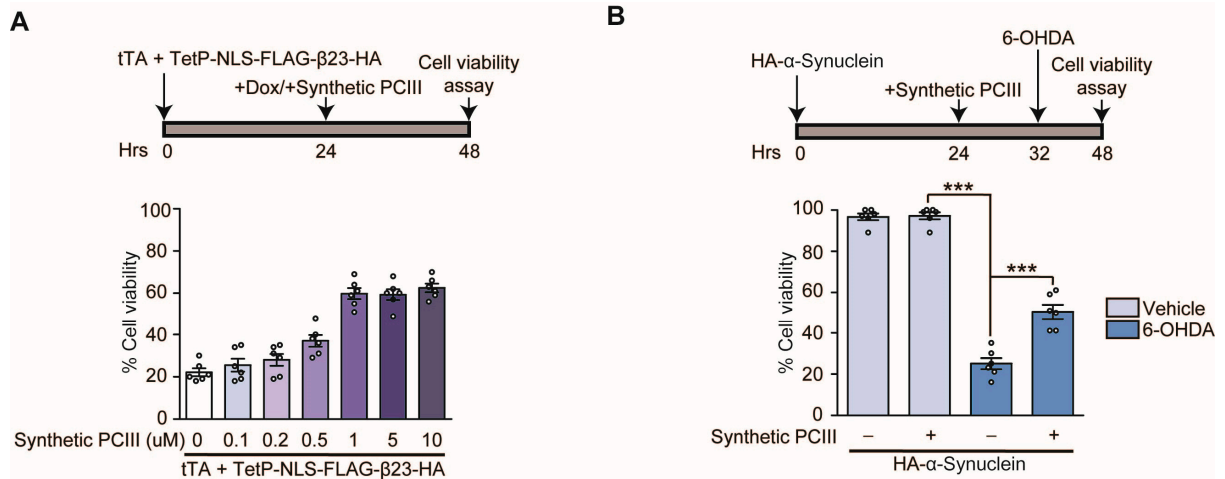

**Supplementary figure 1. PCIII-mediated cytoprotection against amyloid aggregate and oxidative stress**

(A) Trypan blue exclusion cell viability assessment demonstrating cytoprotection by increasing concentrations (0.1, 0.2, 0.5, 1, 5, 10 μM) of synthetic PCIII against nuclear β23 expression in SH-SY5Y cells ( $n = 6$ ). Experimental schedule is illustrated in the top panel.

(B) Trypan blue exclusion cell viability assessment demonstrating cytoprotection by synthetic PCIII (1 μM) against 6-OHDA (70 μM, 16 h)-induced oxidative stress in SH-SY5Y cells transfected with HA-α-synuclein ( $n = 6$ ). Experimental schedule is illustrated in the top panel.

The quantified data are expressed as means ± SEMs. Statistical significance was determined by the ANOVA test with Tukey post-hoc analysis, \*\*\* $p < 0.001$ .
